# Supplementary material for: A look into amyloid formation by transthyretin: aggregation pathway and a novel kinetic model
Source: Royal Society of Chemistry journal article supplement (doi:10.1039/c4cp04549a), 2015-01-01
Supplement: c4cp04549a1.pdf [file c4cp04549a1.pdf]

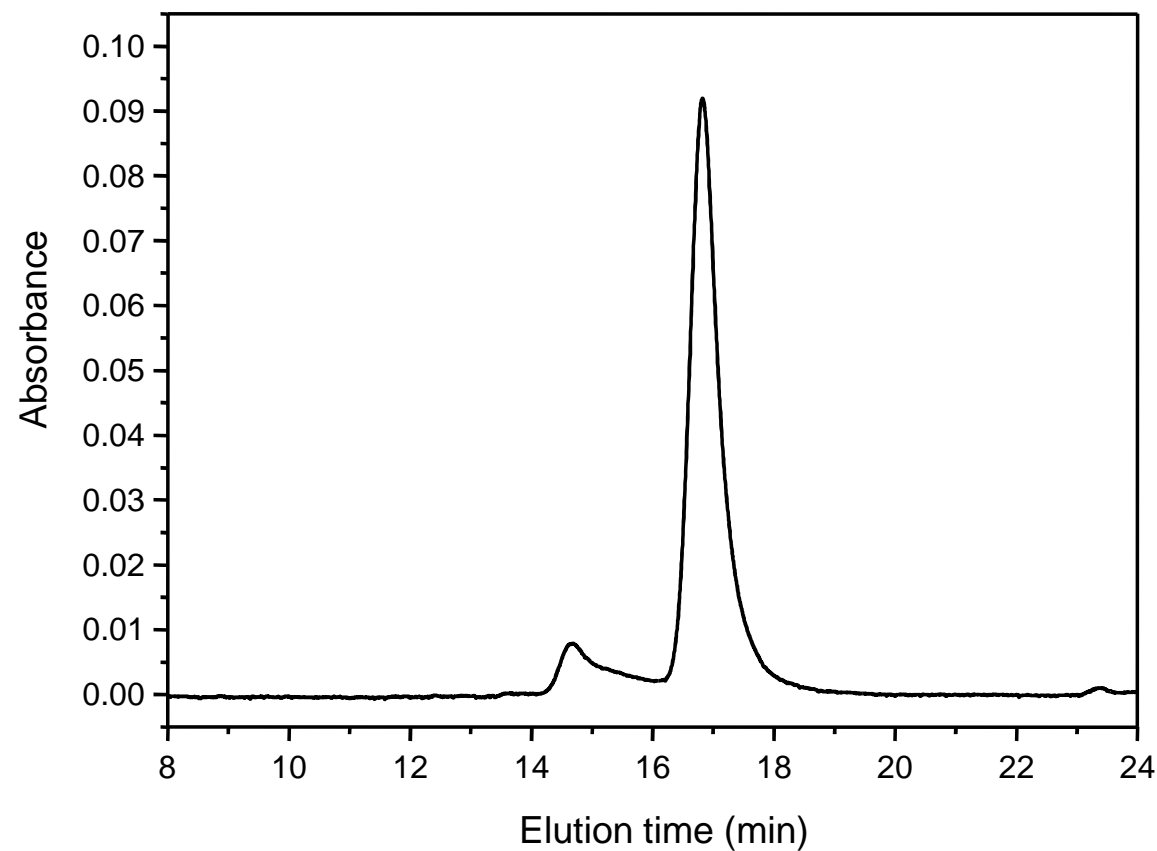

**Fig. S1.** Size exclusion chromatography coupled to multi-angle light scattering (MALS) and absorbance detection of the TTR acid-unfolded monomers. The main peak accounts for more than 95 % of the total protein and the calculated molecular mass was determined to be between 16 and 18 kDa. The molecular mass of the small peak at 15 min was around 54 kDa corresponding to small amount of tetrameric TTR.

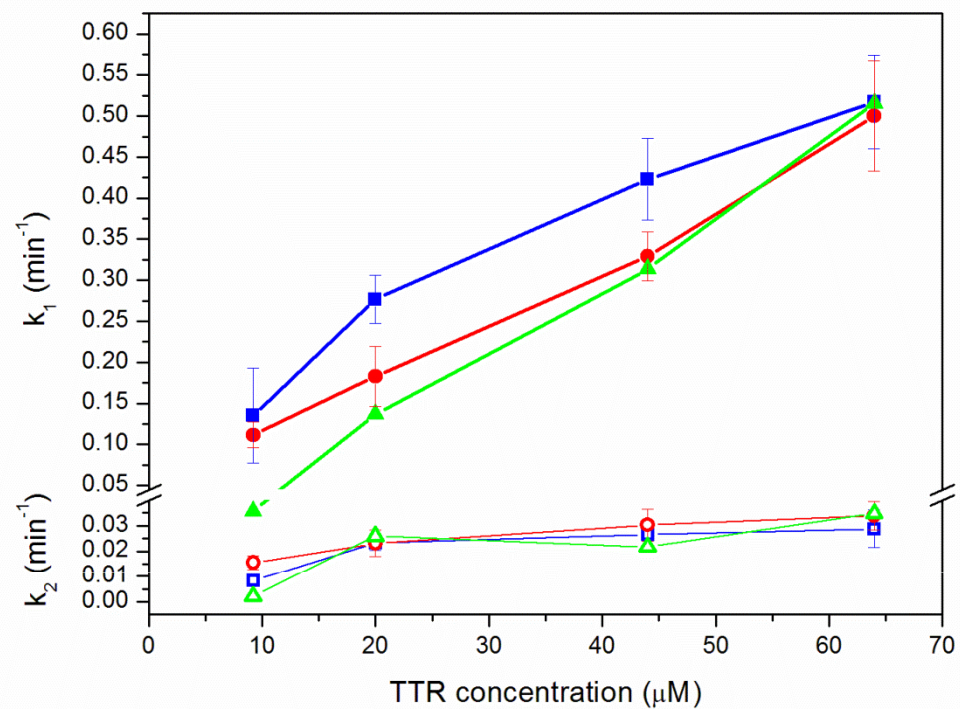

**Fig. S2.** Kinetic constants at different protein concentrations for aggregation of TTR based on a mechanism with two first-order consecutive steps. Dependence of the apparent rate constants  $k_1$  (closed symbols) and  $k_2$  (opened symbols) on TTR concentration determined by far-UV circular dichroism (blue), intrinsic TTR fluorescence (red) and Thioflavin-T fluorescence (green).
